# Supplementary material
Source: ML conference proceedings conference paper supplement (https://openaccess.thecvf.com/content/ICCV2023/html/Shtedritski_What_does_CLIP_ICCV_2023_paper.html)
Supplement: Supplementary file 1 [file Shtedritski_What_does_CLIP_ICCV_2023_supplemental.pdf]

# Appendix

In this supplementary material, we provide more details about the datasets we use, implementation details and ablations, as well as further qualitative and quantitative evaluations.

## 1. Datasets

As noted in the main paper, we contribute additional annotations to the Spair71k dataset for some of our experiments. We start from their keypoint annotations, which have no keypoint name annotations in the original dataset. We then manually name all keypoints of the animal classes in Spair71k, as shown in Table 2. We purposefully leave out some point annotations:

- All animals have a left and right nostril annotated — we take the right one in all classes and annotate it as *nose*, and leave the left nostril out.
- All tails have point annotations at the start of the tail (attached to the body) and end of the tail. Because of the lack of words to precisely describe both points, we take the point *not* attached to the body and annotate it as *tail*, and leave the other one out.
- All ears have point annotations at the start of the ear (attached to the head), and at the pointy end. Because of the lack of words to precisely describe both points, we take the point *not* attached to the head and annotate it as *ear*, and leave the other one out.
- Birds have annotations for (i) foot, (ii) ankle, (iii) knee, which are often ambiguous and very close together. We only keep the *foot* annotation.

Note we explicitly define different names for keypoints that can be ambiguous, e.g. eyes, ears, legs, etc. This ensures the role of questions and answers in ?? is satisfied.

## 2. Discovered annotations

Out of the discovered annotations in YFCC-15M, 44% contain red circles. Overall, 73% of the annotations were circles, and the rest were rectangles. 65% of all annotations were red, 10% yellow, 7% blue, 7% white, and the rest were black, green, and purple.

## 3. Additional implementation details

### 3.1. Referring Expressions Detection.

**Backbone** We base the evaluation of our method on ReCLIP [1], where an ensemble of two CLIP backbones is used — RN50x16 and ViT-B/32. We evaluated ReCLIP for all combinations of CLIP backbones in Table 1 and found

that, on average, this is the highest-performing one. Similarly, for our method, we choose the ensemble of two backbones that lead to the highest performance — RN50x16 and ViT-L/14@336. Full comparison between the backbones can be found in Table 1.

**Annotations** We experiment with different marker shapes, sizes, and colours, and present the results in Table 4. We find that, on average, a thin red circle leads to the best performance. We use an ensemble of the red circle annotation and two additional augmentations — blurring and gray-scaling the outside of the circle, for a total of three images per annotation, as shown. These augmentations were inspired by examples in YFCC15M we discovered that were annotated like that. We found that adding augmentations improves overall results. However, we did not explore including augmentations beyond these. We ablate these choices in Table 3.

**Additional details** We augment the text queries by prepending “*This is*”. When subtracting the average with respect to other referring expressions, we use  $Q = 500$  randomly sampled expressions.

### 3.2. Keypoint tasks

**Backbone** We evaluate different backbones in Table 3 in the main paper and find that ViT-L/14@336 performs best.

**Annotations** We show examples of the markers we use in Fig. 4 in the main paper. We compare a large range of sizes and colors, as shown in Table 2 in the main paper. We find that a circle is the best marker, and drawing a cross over the point of interest is the worst. The best-performing marker out of all is a red circle, which is the one we end up using. In Fig. 2 we show a more detailed comparison of different colors, diameters, and thicknesses when using a circle annotation. We see that a thin red circle is the best-performing marker. We show what that circle looks like on an image in Fig. 3.

Given this, we draw red circles over the images, with radius  $r = 0.06H$  and thickness  $t = 0.01H$ , where  $H$  is the shorter side of the image. For the backbone we use, where the input size has  $H = 336\text{px}$ , this becomes  $r = 20\text{px}$  and  $t = 3\text{px}$ .

**Additional details** For the keypoint localization task, we set  $M = 30$ , for a total of  $30 \times 30 = 900$  query locations before applying the pseudo mask. The templates we use are “*This is the {part} of a bird*” for CUB and “*This image shows the {part} of the {animal}*” for SPair71k. We use a temperature parameter  $\tau = \frac{1}{150}$ .

## 4. Qualitative evaluations

We present qualitative evaluations on naming keypoints in Figs. 6 and 7, keypoint localization in Figs. 3 and 4 and referring expressions comprehension in Fig. 5.

| Method            | Backbone                 | RefCOCO      |              |              | RefCOCO+     |              |              | RefCOCog     |              |
|-------------------|--------------------------|--------------|--------------|--------------|--------------|--------------|--------------|--------------|--------------|
|                   |                          | Val          | TestA        | TestB        | Val          | TestA        | TestB        | Val          | Test         |
| <b>ReCLIP</b>     | RN50×16                  | 37.61        | 38.32        | 37.19        | 44.12        | 46.02        | 41.81        | 55.94        | 54.36        |
|                   | ViT-B/32                 | 40.69        | 43.98        | 37.55        | 45.00        | 48.15        | 41.65        | 55.25        | 54.35        |
|                   | ViT-B/16                 | 38.23        | 40.53        | 37.00        | 41.53        | 42.91        | 41.32        | 55.19        | 55.16        |
|                   | ViT-L/14                 | 34.40        | 33.52        | 34.35        | 37.86        | 37.53        | 37.70        | 53.82        | 52.25        |
|                   | ViT-L/14@336px           | 35.90        | 37.72        | 35.66        | 40.06        | 42.49        | 39.07        | 54.25        | 53.92        |
|                   | RN50×16, ViT-B/32        | <b>41.96</b> | <u>43.52</u> | <u>39.00</u> | <b>47.44</b> | <b>50.11</b> | <b>43.93</b> | 57.76        | <b>57.15</b> |
|                   | RN50×16, ViT-B/1         | 39.94        | 41.61        | 38.71        | 45.06        | 47.17        | <u>43.63</u> | <u>57.93</u> | 56.85        |
|                   | RN50×16, ViT-L/14        | 37.98        | 38.08        | 37.51        | 42.87        | 44.57        | 41.66        | 56.78        | 56.02        |
|                   | RN50×16, ViT-L/14@336px  | 38.79        | 39.49        | 37.82        | 44.27        | 46.44        | 42.46        | 57.86        | 56.28        |
|                   | ViT-B/32, ViT-B/16       | <u>41.34</u> | <b>44.25</b> | 38.55        | <u>45.20</u> | 48.01        | 43.36        | 57.37        | 56.52        |
|                   | ViT-B/32, ViT-L/14       | 39.68        | 41.65        | 37.84        | 43.74        | 46.25        | 41.17        | 56.74        | 56.07        |
|                   | ViT-B/32, ViT-L/14@336px | 40.82        | 43.47        | <b>39.22</b> | 45.41        | <u>48.52</u> | 42.83        | <b>58.09</b> | <u>56.94</u> |
|                   | ViT-B/16, ViT-L/14       | 37.69        | 38.29        | 37.53        | 40.87        | 42.07        | 40.93        | 56.35        | 55.76        |
|                   | ViT-B/16, ViT-L/14@336px | 39.18        | 41.01        | 38.35        | 42.81        | 44.32        | 42.07        | 57.82        | 56.21        |
|                   | ViT-L/14, ViT-L/14@336px | 35.47        | 36.26        | 35.70        | 39.52        | 40.69        | 38.70        | 54.51        | 54.04        |
| <b>Red Circle</b> | RN50×16                  | 45.52        | 52.99        | 38.59        | 49.98        | 57.55        | 42.11        | 53.94        | 54.35        |
|                   | ViT-B/32                 | 38.72        | 45.09        | 33.52        | 42.85        | 49.46        | 36.53        | 45.81        | 45.57        |
|                   | ViT-B/16                 | 45.30        | 52.70        | 36.51        | 49.39        | 57.67        | 40.60        | 53.72        | 53.26        |
|                   | ViT-L/14                 | 46.71        | 55.03        | 39.24        | 52.07        | 58.63        | 42.83        | 57.00        | 56.40        |
|                   | ViT-L/14@336             | 48.27        | 56.44        | 39.71        | 53.59        | 59.99        | 43.28        | <b>59.95</b> | 58.51        |
|                   | RN50×16, ViT-B/32        | 45.62        | 54.04        | 37.13        | 50.73        | 60.46        | 41.69        | 54.00        | 53.84        |
|                   | RN50×16, ViT-B/16        | <b>49.98</b> | 57.15        | 38.04        | 52.98        | 61.95        | 42.99        | 56.01        | 55.78        |
|                   | RN50×16, ViT-L/14        | 48.50        | 58.03        | 39.76        | 54.56        | 63.17        | <u>44.41</u> | 58.17        | 57.76        |
|                   | RN50×16, ViT-L/14@336    | 49.84        | <b>58.57</b> | <u>39.96</u> | <u>55.28</u> | <b>63.92</b> | <b>45.35</b> | <u>59.40</u> | <b>58.93</b> |
|                   | ViT-B/32, ViT-B/16       | 44.62        | 53.03        | 35.90        | 49.13        | 58.96        | 40.21        | 52.23        | 51.61        |
|                   | ViT-B/32, ViT-L/14       | 47.19        | 56.27        | 38.14        | 52.75        | 62.07        | 42.69        | 56.66        | 55.54        |
|                   | ViT-B/32, ViT-L/14@336px | 48.59        | 58.05        | 38.69        | 54.61        | <u>63.45</u> | 43.28        | 57.80        | 57.48        |
|                   | ViT-B/16, ViT-L/14       | 48.18        | 57.49        | 39.33        | 53.66        | 62.38        | 43.36        | 57.56        | 57.45        |
|                   | ViT-B/16, ViT-L/14@336px | <u>49.86</u> | <u>58.41</u> | 39.92        | <b>55.35</b> | 62.43        | 44.34        | 59.05        | <u>58.82</u> |
|                   | ViT-L/14, ViT-L/14@336px | 48.82        | 57.03        | <b>40.35</b> | 53.62        | 60.65        | 44.04        | 59.03        | 58.27        |

Table 1: Backbone ablation on **Referring Expressions Detection**. We compare CLIP backbones and their ensembles for ReCLIP [1] (without using relations resolution) and our Red Circle. The best and second best for each method are **bolded** and underlined, respectively.

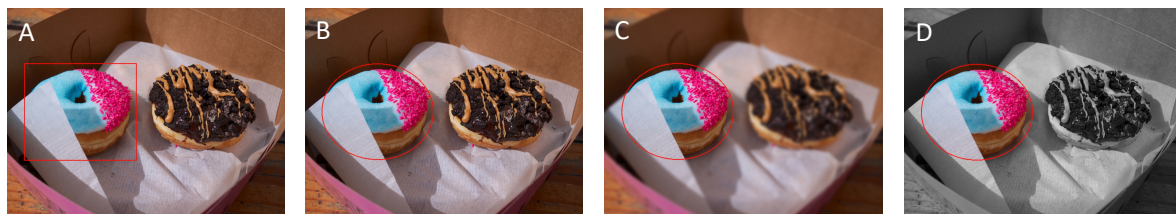

Figure 1: **Annotations for Referring Expressions Detection**. Here we show the annotation types we consider. A: original bounding box annotation. B: Red Circle. C: Red Circle + Blur outside. D: Red Circle + Gray outside. In our experiments, we use an ensemble of B, C and D unless stated otherwise.

| Part No | Bird       | Cat             | Cow              | Dog             | Horse            | Sheep            |
|---------|------------|-----------------|------------------|-----------------|------------------|------------------|
| 0       | crown      | —               | —                | —               | —                | —                |
| 1       | right wing | —               | —                | —               | —                | —                |
| 2       | left wing  | right ear       | right ear        | right ear       | right ear        | right ear        |
| 3       | beak       | left ear        | left ear         | left ear        | left ear         | left ear         |
| 4       | —          | right eye       | right eye        | right eye       | right eye        | right eye        |
| 5       | —          | left eye        | left eye         | left eye        | left eye         | left eye         |
| 6       | forehead   | nose            | nose             | nose            | nose             | nose             |
| 7       | right eye  | —               | —                | forehead        | —                | —                |
| 8       | left eye   | mouth           | mouth            | mouth           | mouth            | mouth            |
| 9       | nape       | front right paw | front right hoof | front right paw | forehead         | front right hoof |
| 10      | right foot | front left paw  | front left hoof  | front left paw  | front right hoof | front left hoof  |
| 11      | left foot  | hind right paw  | hind right hoof  | hind right paw  | front left hoof  | hind left hoof   |
| 12      | —          | hind left paw   | hind left hoof   | hind left paw   | hind right hoof  | hind right hoof  |
| 13      | tail       | tail            | tail             | tail            | hind left hoof   | tail             |
| 14      | —          | —               | —                | —               | tail             | —                |
| 15      | —          | —               | front right knee | neck            | —                | front right knee |
| 16      | —          | —               | front left knee  | —               | front right knee | front left knee  |
| 17      | —          | —               | hind right knee  | —               | front left knee  | hind right knee  |
| 18      | —          | —               | hind left knee   | —               | hind right knee  | hind left knee   |
| 19      | —          | —               | right horn       | —               | hind left knee   | right horn       |
| 20      | —          | —               | left horn        | —               | —                | —                |

Table 2: **Part names for keypoint annotations of the SPair71k dataset.** Part No is the part number in the SPair71k annotations. Some parts are annotated inconsistently in the original annotations, e.g. “tail” is part number 10 for the “horse” class, but part number 9 for all other animal classes.

| Component  |          |          | RefCOCO      |              |              | RefCOCO+     |              |              | RefCOCOg     |              |
|------------|----------|----------|--------------|--------------|--------------|--------------|--------------|--------------|--------------|--------------|
| Red Circle | Subtract | Ensemble | Val          | TestA        | TestB        | Val          | TestA        | TestB        | Val          | Test         |
| ✓          | ✗        | ✗        | 42.01        | 48.58        | 36.90        | 47.55        | 53.56        | 41.05        | 50.84        | 51.47        |
| ✓          | ✓        | ✗        | 43.67        | 50.20        | 38.59        | 48.98        | 54.70        | 43.06        | 54.29        | 52.98        |
| ✓          | ✓        | ✓        | <b>49.84</b> | <b>58.57</b> | <b>39.96</b> | <b>55.28</b> | <b>63.92</b> | <b>45.35</b> | <b>59.40</b> | <b>58.93</b> |

Table 3: **Ablation study.** We ablate subtracting the mean wrt negative queries and ensembling different marker types (red circle + red circle and blur outside + red circle and grey outside). Here we use RN50×16 and ViT-L/14@336px backbones and a red circle with the optimal size described in Table 4

## References

- [1] Sanjay Subramanian, Will Merrill, Trevor Darrell, Matt Gardner, Sameer Singh, and Anna Rohrbach. Reclip: A strong zero-shot baseline for referring expression comprehension. *arXiv preprint arXiv:2204.05991*, 2022. 1, 2

| Annotation Type |        |      | RefCOCO     |             |             | RefCOCO+    |             |             | RefCOCOg    |             |
|-----------------|--------|------|-------------|-------------|-------------|-------------|-------------|-------------|-------------|-------------|
| Shape           | Color  | Size | Val         | TestA       | TestB       | Val         | TestA       | TestB       | Val         | Test        |
| Circle          | Red    | 1    | 38.7        | <u>45.1</u> | <u>34.0</u> | 44.4        | <b>50.0</b> | <u>39.1</u> | 48.1        | <b>50.0</b> |
| Circle          | Red    | 2    | 32.2        | 35.9        | 29.1        | 37.6        | 40.9        | 33.5        | 45.3        | 46.4        |
| Circle          | Red    | 4    | 37.4        | 43.6        | 31.5        | 43.3        | 47.8        | 37.3        | 43.7        | 48.0        |
| Circle          | Red    | 8    | 36.3        | 42.6        | 31.3        | 42.1        | 47.3        | 36.3        | 45.2        | 45.4        |
| Rectangle       | Red    | 1    | 35.1        | 38.3        | 33.5        | 39.2        | 41.4        | 37.3        | 44.3        | 43.4        |
| Rectangle       | Red    | 2    | 35.1        | 38.3        | 33.2        | 39.1        | 41.8        | 37.3        | 44.8        | 44.1        |
| Rectangle       | Red    | 4    | 34.1        | 37.8        | 32.3        | 39.0        | 41.3        | 36.5        | 43.7        | 44.1        |
| Rectangle       | Red    | 8    | 33.7        | 37.6        | 32.7        | 37.9        | 40.3        | 34.9        | 41.1        | 40.1        |
| Circle          | Green  | 1    | <b>39.3</b> | <b>45.4</b> | <b>34.8</b> | 43.8        | <u>49.9</u> | 38.1        | 47.2        | 47.4        |
| Circle          | Purple | 1    | 38.9        | 44.8        | 34.0        | <b>44.5</b> | 49.4        | <b>39.2</b> | <b>49.5</b> | <u>49.2</u> |
| Circle          | Blue   | 1    | 37.7        | 44.9        | 33.5        | 43.4        | 49.1        | 37.3        | 48.2        | 48.3        |
| Circle          | Yellow | 1    | 38.5        | 44.1        | 34.6        | 43.7        | 49.0        | 38.9        | <u>48.6</u> | 48.1        |

Table 4: **Comparison of different sizes, shapes, colors.** A unit size of 1 corresponds to 0.5% of the larger side of the image, which is 1 pixel for an image of size 224. Here we do *not* use ensembling and subtraction of the mean wrt other queries in order to evaluate the effectiveness of different markers themselves. The best and second best are **bolded** and underlined, respectively.

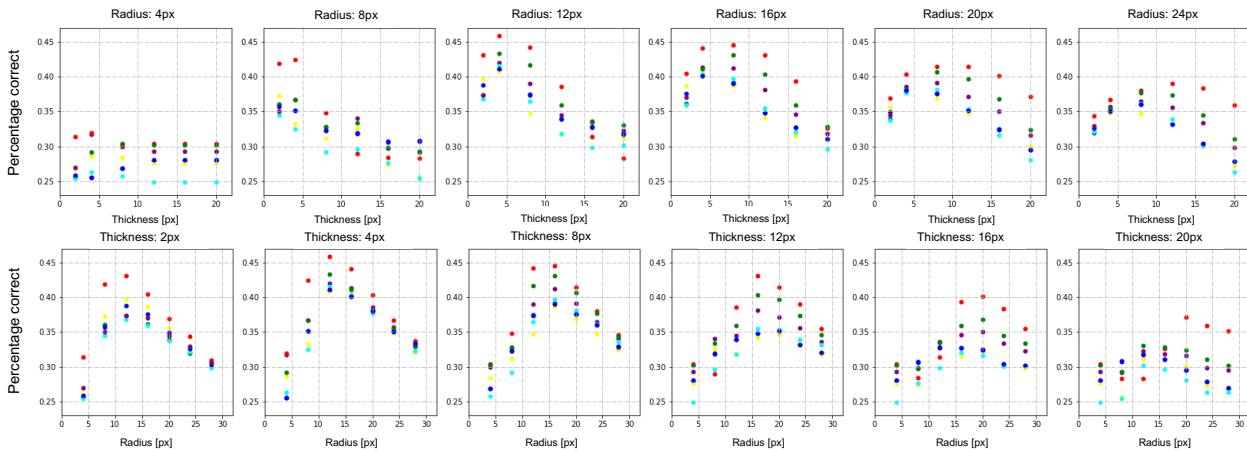

Figure 2: **Ablation of circle sizes and colours for keypoint matching.** We present results on the CUB dataset when varying the diameter and thickness of the annotations. The presented numbers are for text-to-image matching. The best performing annotation has a radius of 12px and thickness of 4px. The colour of the dots on the scatter plot illustrates the colour of the annotation — red, green, blue purple, yellow, cyan.

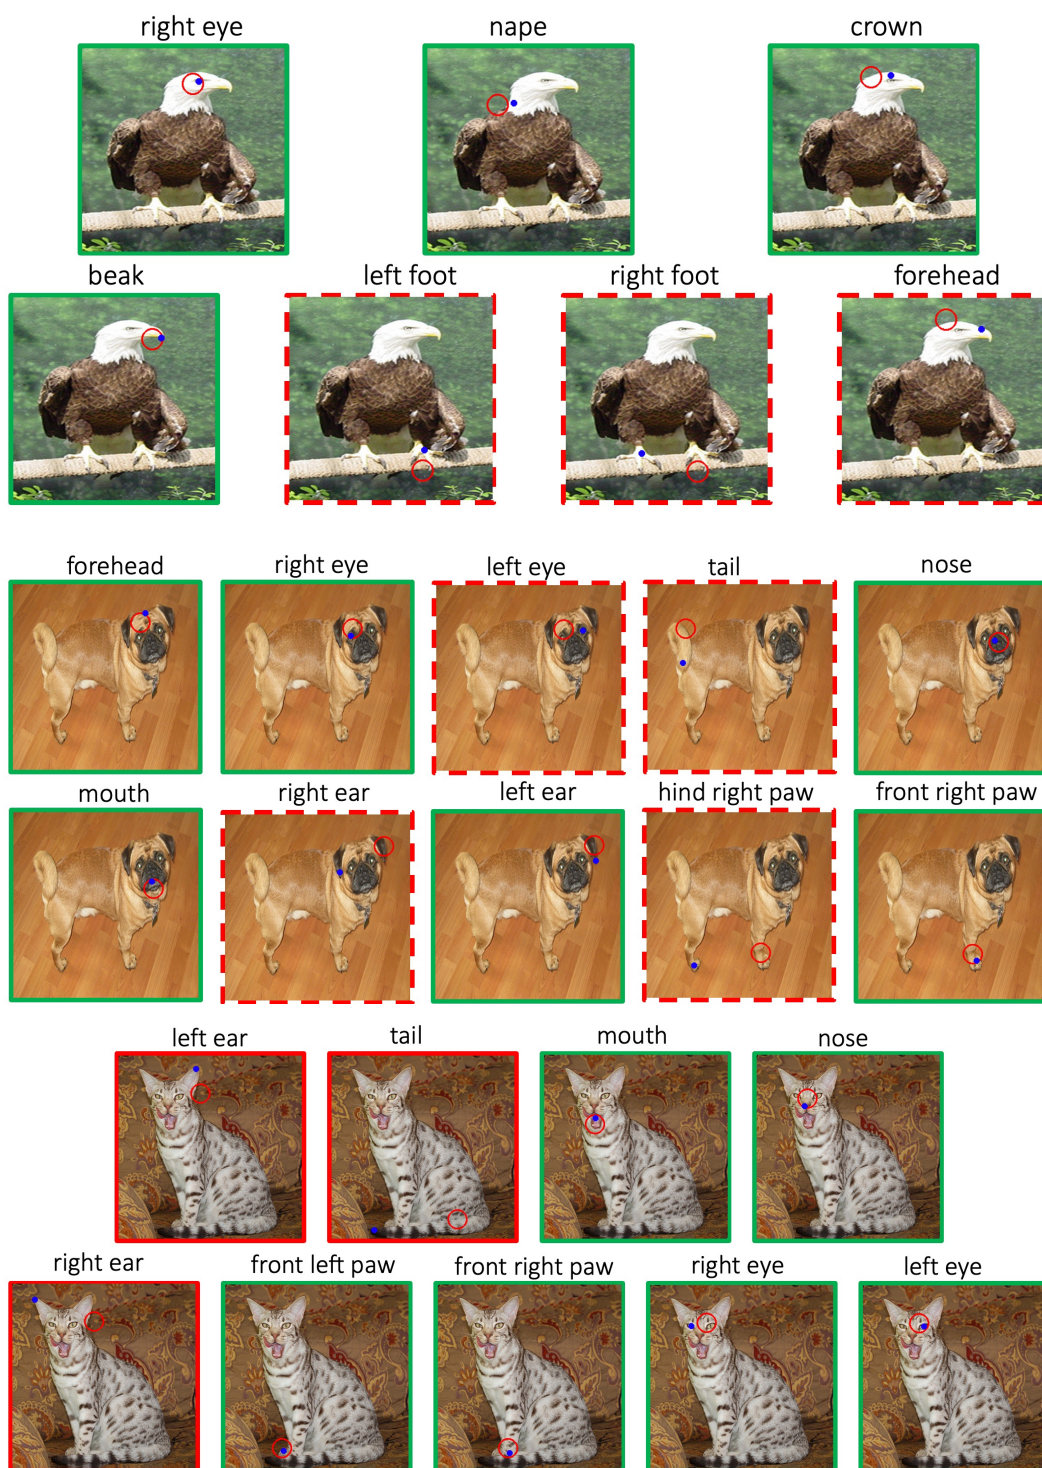

Figure 3: **Qualitative evaluation of keypoint localization on SPair71k.** We show all keypoint names for the images and color code in green and red (dashed) the correct and wrong localizations according to PCK with  $\alpha = 0.1$ . The red circle is the marker we use and the blue dot is the ground truth location.

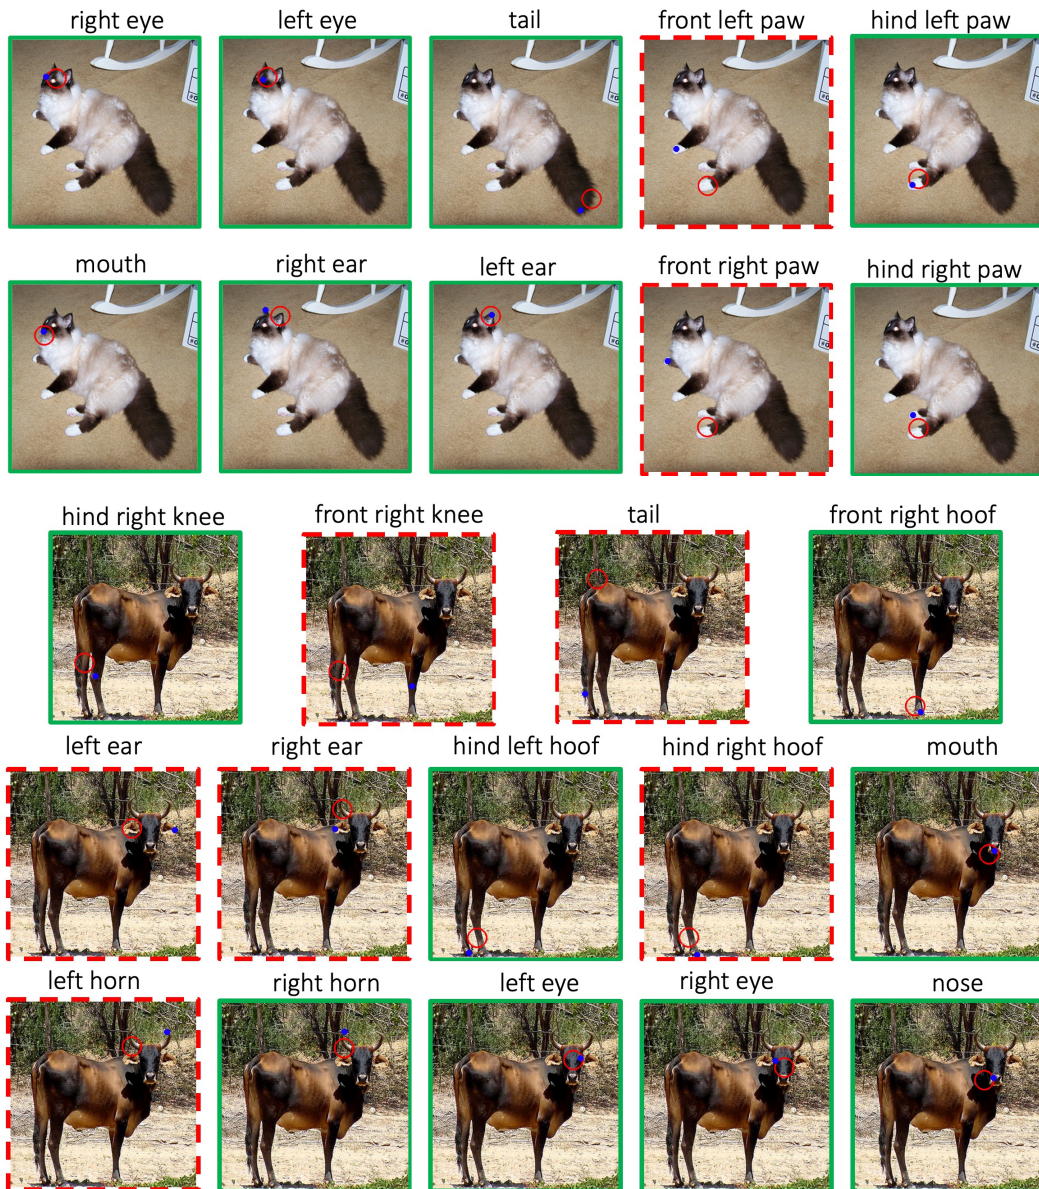

Figure 4: **Qualitative evaluation of keypoint localization on SPair71k.** We show all keypoint names for the images and color code in green and red (dashed) the correct and wrong localizations according to PCK with  $\alpha = 0.1$ . The red circle is the marker we use and the blue dot is the ground truth location.

Referring expression

Prediction

Ground truth

A van parked behind a yellow school bus

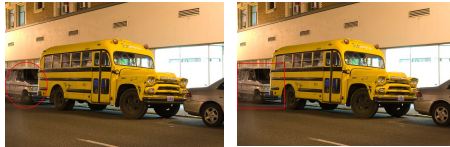

A chair by the wall in a bedroom

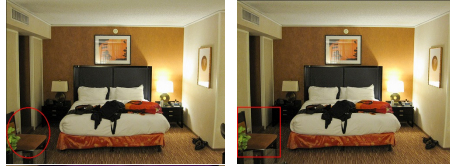

A container of sliced apples

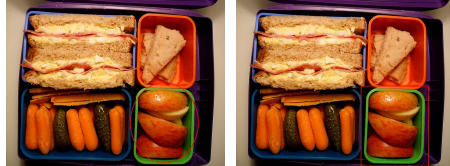

A cup of ice water

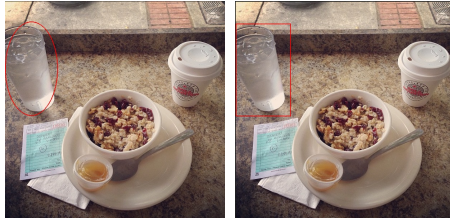

A plastic bottle of blue mouthwash on a sink

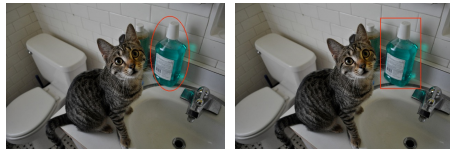

A red truck has its hood and doors open

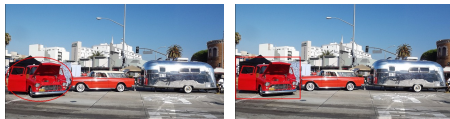

Referring expression

Prediction

Ground truth

A sheep grazing with a bunch of fur on its back

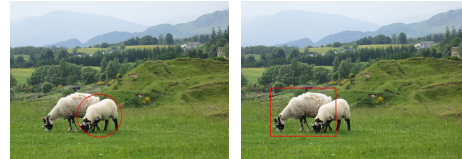

Bowl on right

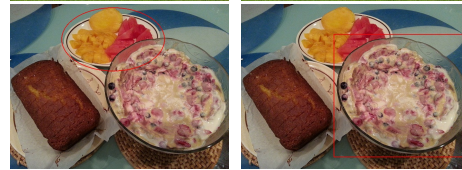

Purple box sitting in between a book of sketches and a blue book

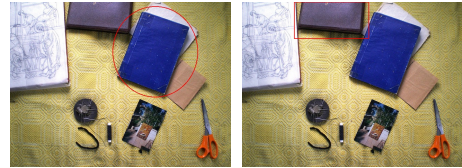

The brown teddy bear along with a black teddy

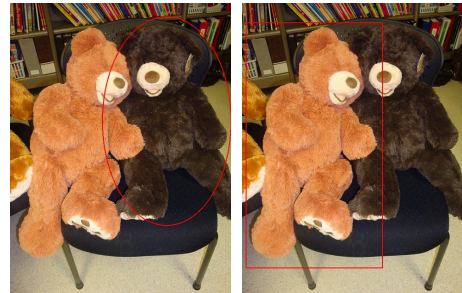

The laptop on the left

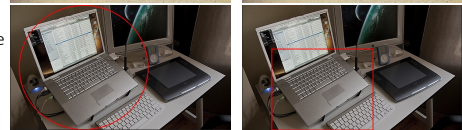

Figure 5: **Qualitative results on REC on the RefCOCOg dataset.** Left: correct predictions. Right: wrong predictions. The last row on the right shows an example where the ground-truth bounding box is wrong.

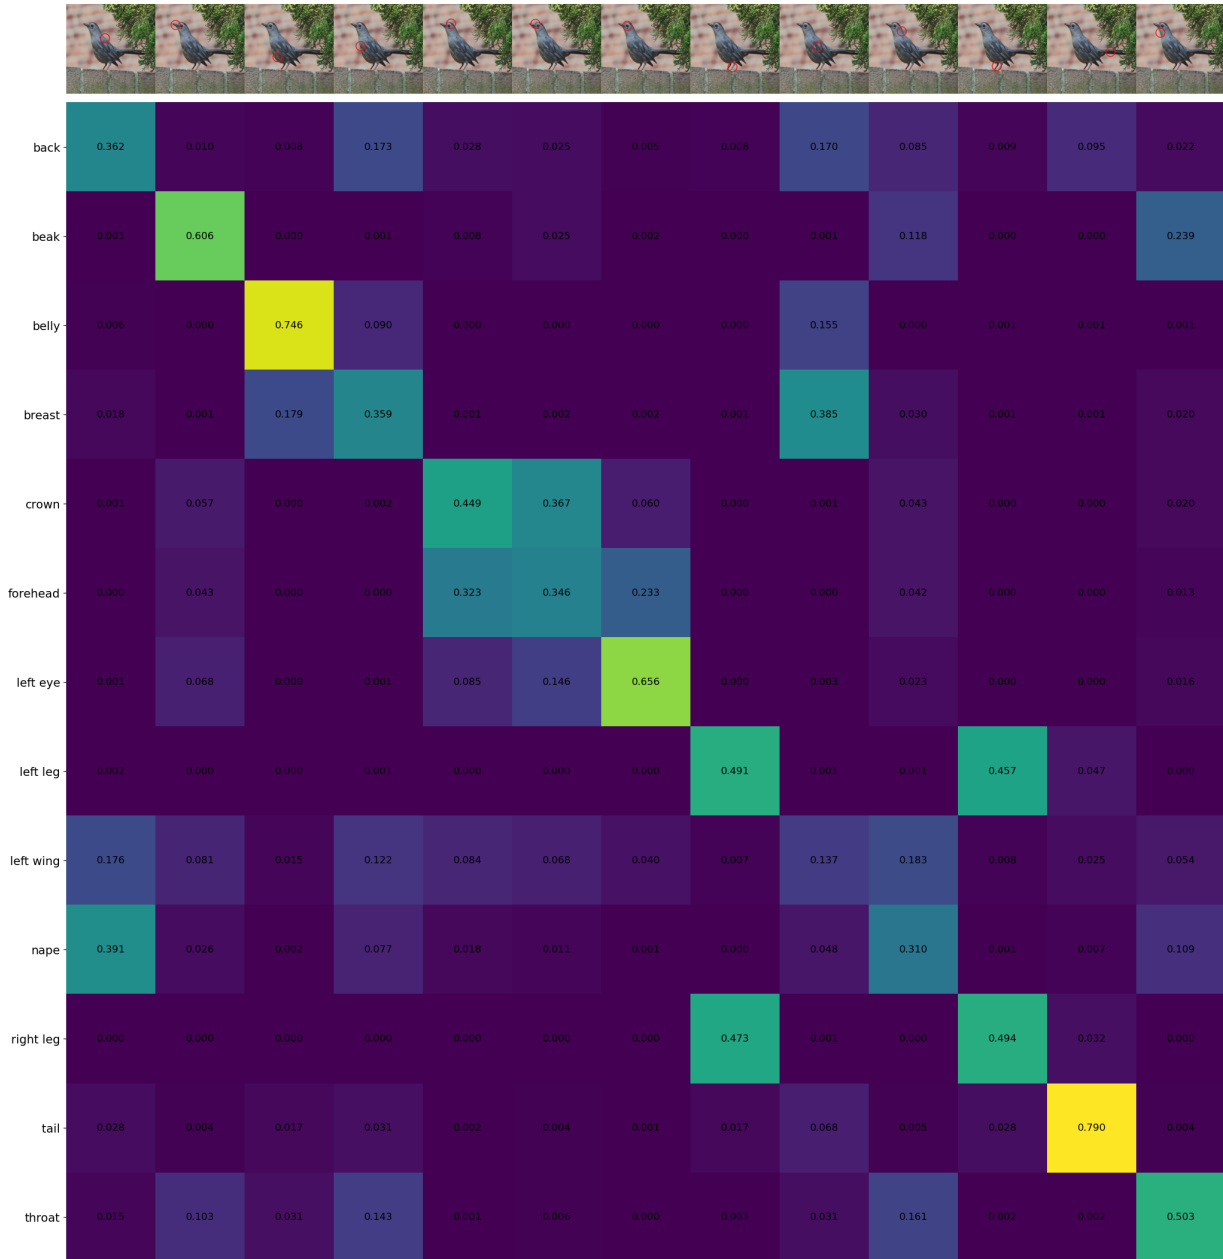

Figure 6: Naming keypoints. Normalized cost matrix for an image from CUB



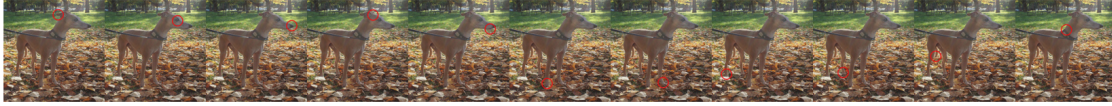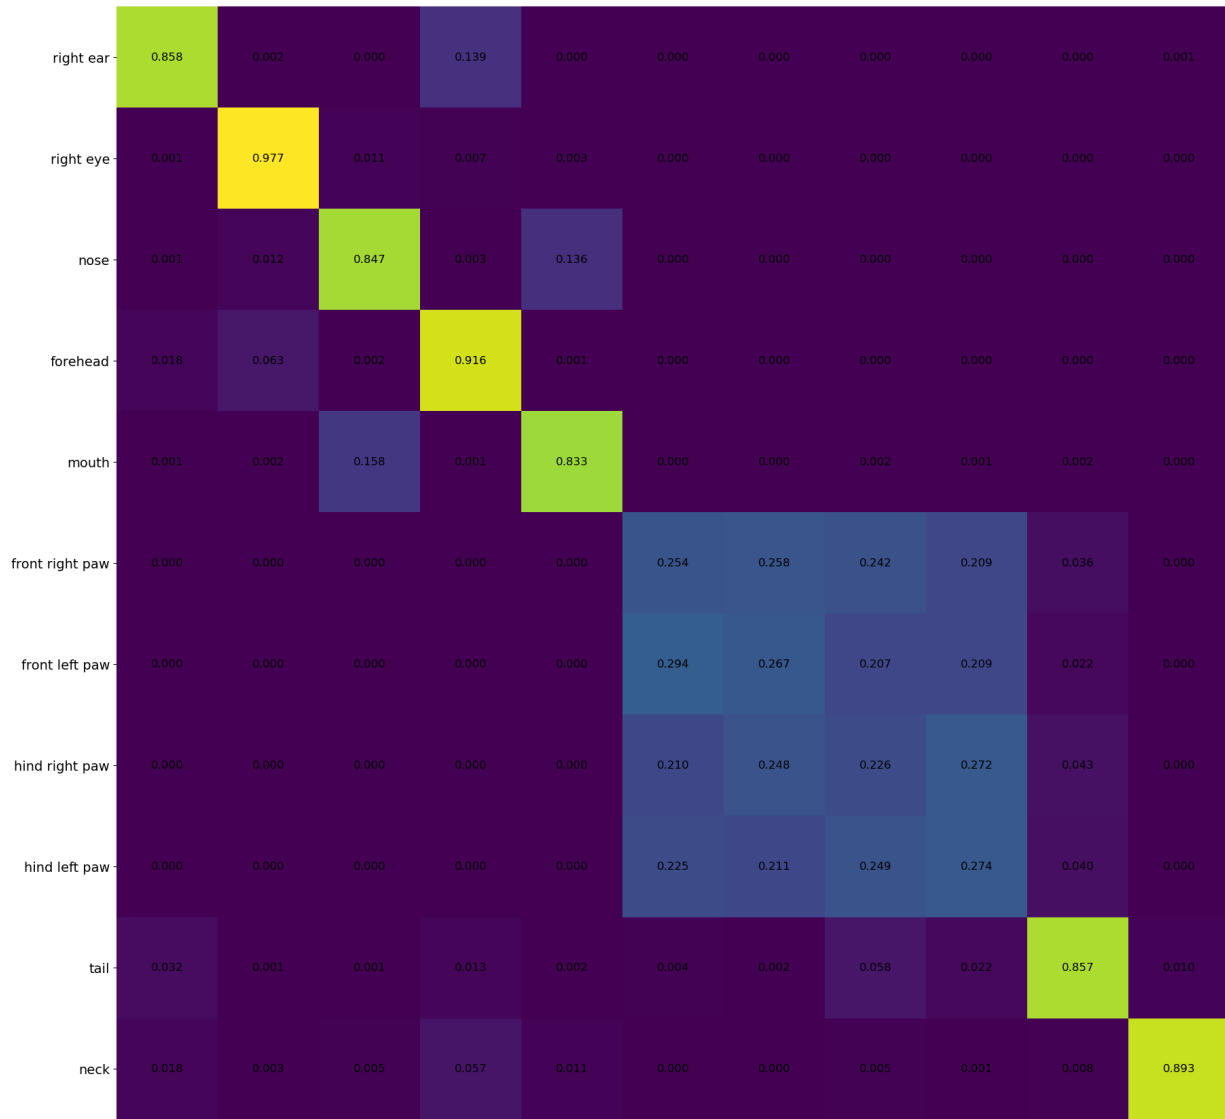

Figure 7: **Naming keypoints.** Normalized cost matrix for an image from SPair71k
